# Supplementary material for: Host Determinants of Expression of the Helicobacter pylori BabA Adhesin
Source: PubMed Central journal article supplement (PMC5394467; doi:10.1038/srep46499), 2017-04-18
Supplement: srep46499-s1.pdf [file srep46499-s1.pdf]

# Host Determinants of Expression of the *Helicobacter pylori* BabA Adhesin

Mary E. Kable, Lori M. Hansen, Cathy M. Styer, Samuel L. Deck, Olena Rakhimova, Anna Shevtsova, Kathryn A. Eaton, Miriam E. Martin, Pär Gideonsson, Thomas Borén, and Jay V. Solnick

## Supplementary Files

**Supplementary Table S1.** Mouse Strains

| Strain                     | Gender      | Vendor <sup>a</sup>        |
|----------------------------|-------------|----------------------------|
| C57BL/6                    | Female      | Taconic                    |
| RAG2 <sup>-/-</sup>        | Female      | Taconic                    |
| C57BL/6                    | Female      | Jackson Laboratory         |
| MyD88 <sup>-/-</sup>       | Female      | Jackson Laboratory         |
| TLR2 <sup>-/-</sup>        | Female      | Jackson Laboratory         |
| TLR4 <sup>-/-</sup>        | Female      | Jackson Laboratory         |
| FVB/N                      | Male/Female | Charles River Laboratories |
| Le <sup>b</sup> transgenic | Male/Female | Colony maintained          |

<sup>a</sup> Jackson Laboratory, Sacramento, CA, USA; Taconic, Germantown, NY, USA; Charles River Laboratories, Wilmington, MA, USA

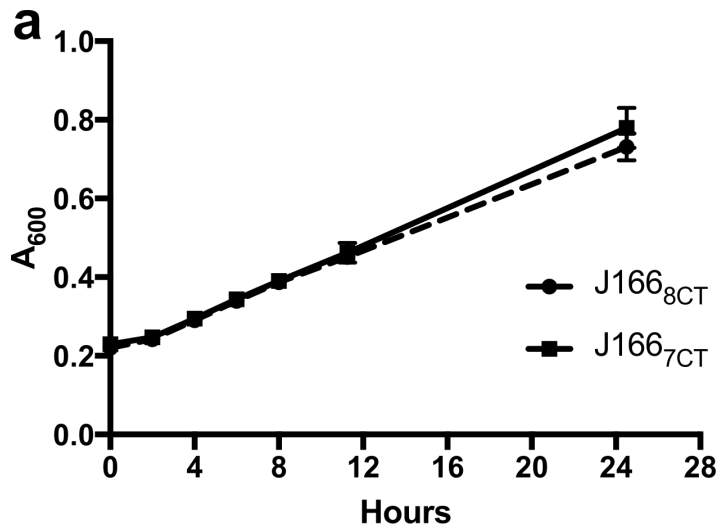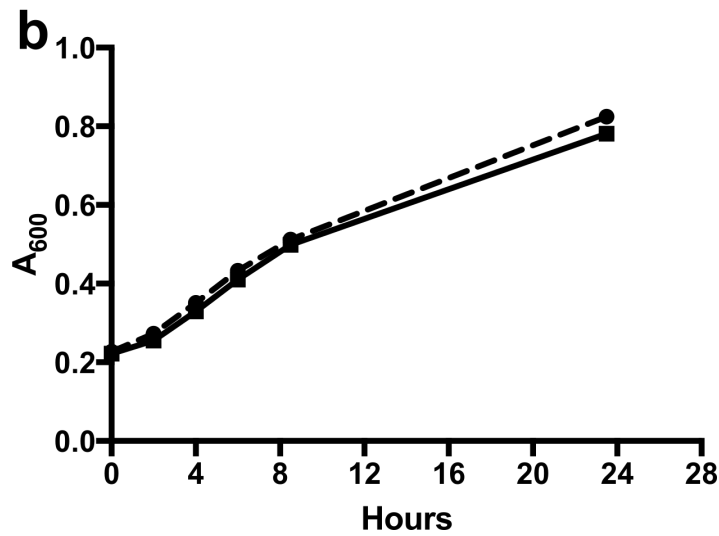

**Supplementary Figure S1. Growth curves of J166<sub>8CT</sub> and J166<sub>7CT</sub>.** Mean ( $\pm$ SEM)  $A_{600}$  for 3 individual clones of J166<sub>8CT</sub> and J166<sub>7CT</sub> grown in Brucella broth overnight showed no differences in growth rate. The experiment was conducted twice (A and B) to ensure that subtle, non-significant variation in growth rate was not robust.

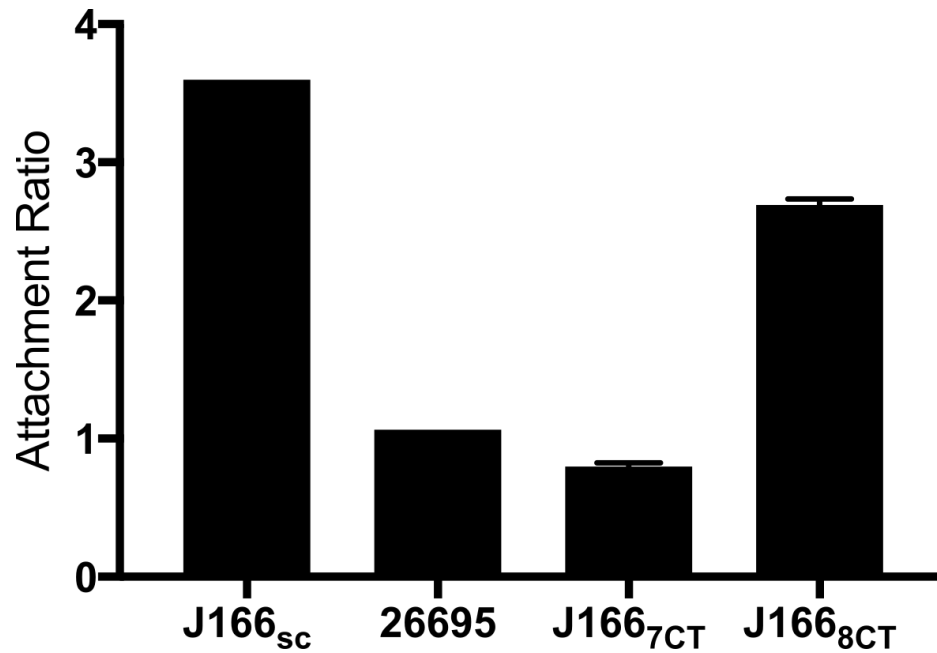

**Supplementary Figure S2. Le<sup>b</sup> ELISA assay to detect functional BabA expression in *H. pylori* clones.** Clones of J166<sub>sc</sub> engineered with 8 or 7 CT repeats in the 5' end of *babA* were evaluated for attachment to Le<sup>b</sup> using an ELISA. The average attachment ratios for three clones of J166<sub>8CT</sub> and J166<sub>7CT</sub> are shown. *H. pylori* J166<sub>sc</sub> and 26695 served as positive and negative controls, respectively.



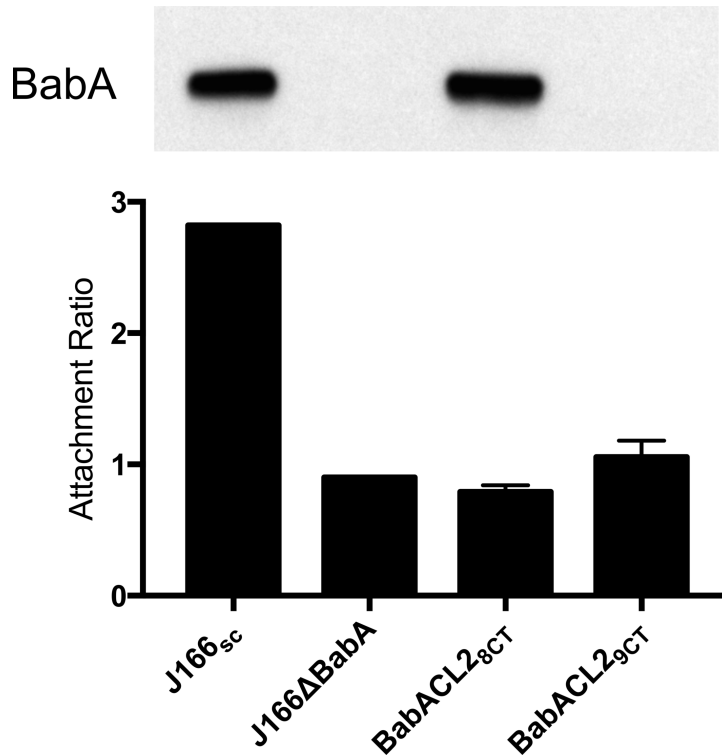

**Supplementary Figure S4. Anti-BabA western blot and Le<sup>b</sup> ELISA assay to detect BabA expression and function in *H. pylori* clones.** Clones of BabACL2 with 8 or 9 CT repeats in the 5' end of *babA* were evaluated for expression of BabA by western blot (upper panel) and attachment to Le<sup>b</sup> using an ELISA (lower panel). The average attachment ratios for three clones of BabACL2<sub>8CT</sub> and BabACL2<sub>9CT</sub> are shown. *H. pylori* J166<sub>SC</sub> and J166ΔBabA served as positive and negative controls, respectively.

#### Supplementary References

1. Alm, R. A. *et al.* Genomic-sequence comparison of two unrelated isolates of the human gastric pathogen *Helicobacter pylori*. *Nature* **397**, 176-180, doi:10.1038/16495 (1999).
2. Styer, C. M. *et al.* Expression of the BabA adhesin during experimental infection with *Helicobacter pylori*. *Infect Immun* **78**, 1593-1600, doi:10.1128/IAI.01297-09 (2010).
